# Supplementary material
Source: PubMed Central journal article supplement (PMC6652766)
Supplement: IAI.00227-19-s0001.pdf [file IAI.00227-19-s0001.pdf]

## Supplemental Data

### Supplemental Fig. 1

IDM2 immunogen insert amino acid sequence:

MAPIIHRNLTAPELVQWALKLEKDTKLSARGALCVLSYAKTGRSPRDKRVVDTDDVRE  
NVDWGSVNVKLSEESFAKVKKRAMDFLNSRDHLFIVDCFAGHDERYRLKVRVITARP  
HALFMYNMLIRPTQQELENFGEPEYTIYNAGEHSADPSVPGVTSTTSVSLNFKTGEEVI  
LGTEYAGEMKKGILTVMFELMPRQGHLCMHASANVGKKGDVTVFFGLSGTGKTTLSA  
DPNRMLIGDDEHVWTRDGVFNIEGGCYAKAIGLNPKTEEEIYNAVRFGAVAENCTLDK  
ATHEIDFNDESICKNTRVAYPLEHIPGALTHAVAGHPNNVIFLTNDAFGVMPPVARLTPE  
QAMFWFIMGYTANVPGVEAGSTPVAKPIFSSCFAGPFLVRHATFYGEQLAKKMTEHN  
ARVWLLNTGYAGGRADRGAKRMPLKVTRAVIDAIHDGSLDKEEYCVYPGWGLQIPKR  
CARVPAQLLDRKAWKDVKAFNETTKELVAMFQASFQKRFAAKASEALKSAVPKYVE  
TAHL

PB immunogen insert amino acid sequence:

MAPIIHRNLTVPPELVQWALKLEKDTVLSARGTLCVLSYAKTGRSPRDKRVVDTDDVRS  
NVDWGSVNMKLSEESFAKAKKHAIIDFLNSREHMFVVDVCFAGHDERYRLKVRVITARP  
YHALFMYNMLIRPTQKELESFGEPEYTIYNAGECSADPSVPGITSKTSVSLNFKTQEEVI  
LGTEYAGEMKKGILTVMFELMPRQGHLCMHASANVGKKGDVTVFFGLSGTGKTTLSA  
DPNRMLIGDDEHVWTRDGVFNIEGGCYAKAIGLNPKTEEEIYNAVRFGAVAENCRLDK  
TTHEIDFNDESICKNTRVAYPLEHIPGALTHAVAGHPNPNVIFLTNDAFGVMPPVARLTPE  
QAMFWFIMGYTANVPGVEAGNLPVAKPVFSACFAGPFLVRHATFYGEQLAKKMTEHN  
ARVWLLNTGYAGGRADRGAKRMPLKVTRAVIDAIHDGSLDREEYIVYPGWGLHIPKCC  
ARVPSHLLDPRKAWKDVKAFNHTAKELVMMFQESFEKRFASKASDALKSAPKYVEC  
AHL

### Supplemental Figure 2

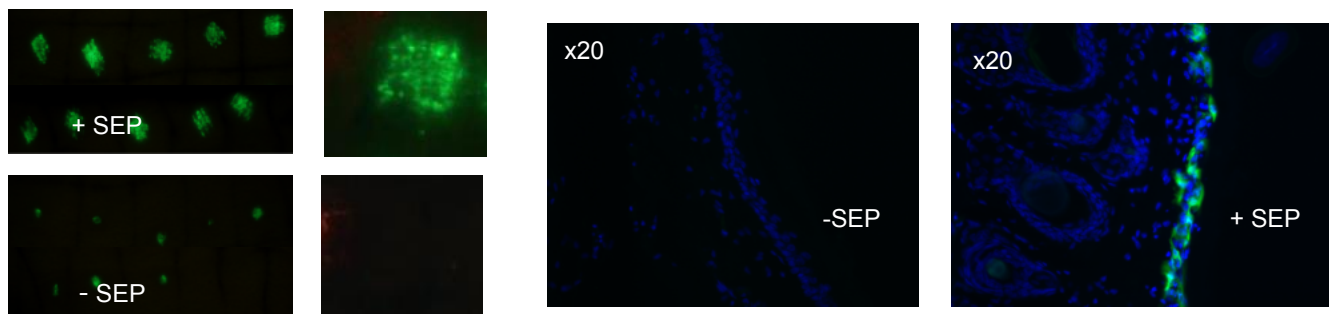

Intradermal delivery of GFP to guinea pig skin with or without SEP

### Supplemental Figure 3

|       |            |             |            |            |             |
|-------|------------|-------------|------------|------------|-------------|
|       | 10         | 20          | 30         | 40         | 50          |
| IDM2: | MAPIIHRNLT | APELVQWALK  | LEKDTKLSAR | GALCVLSYAK | TGRSPRDKRV  |
| PB:   | MAPIIHRNLT | VPDELVQWALK | LEKDTVLSAR | GTLCVLSYAK | TGRSPRDKRV  |
|       | 60         | 70          | 80         | 90         | 100         |
| IDM2: | VDTDDVRENV | DWGSVNVKLS  | EESFAKVKKR | AMDFLNSRDH | LFIVDCFAGH  |
| PB:   | VDTDDVRSNV | DWGSVNMKLS  | EESFAKAKKH | AIDFLNSREH | MFVVDCFAGH  |
|       | 110        | 120         | 130        | 140        | 150         |
| IDM2: | DERYRLKVRV | ITARPYHALF  | MYNMLIRPTQ | QELENFGEPE | YTIYNAGEHS  |
| PB:   | DERYRLKVRV | ITARPYHALF  | MYNMLIRPTQ | KELESFGEPE | YTIYNAGECS  |
|       | 160        | 170         | 180        | 190        | 200         |
| IDM2: | ADPSVPGVTS | TTSVSLNFKT  | GEEVILGTEY | AGEMKKGILT | VMFELMPRQG  |
| PB:   | ADPSVPGITS | KTSVSLNFKT  | QEEVILGTEY | AGEMKKGILT | VMFELMPRQG  |
|       | 210        | 220         | 230        | 240        | 250         |
| IDM2: | HLCMHASANV | GKKGDVTVFF  | GLSGTGKTTL | SADPNRMLIG | DDEHVWTDREG |
| PB:   | HLCMHASANV | GKKGDVTVFF  | GLSGTGKTTL | SADPNRMLIG | DDEHVWTDREG |
|       | 260        | 270         | 280        | 290        | 300         |
| IDM2: | VFNIEGGCYA | KAIGLNPKTE  | EEIYNAVRFG | AVAENCTLDK | ATHEIDFNDE  |
| PB:   | VFNIEGGCYA | KAIGLNPKTE  | EEIYNAVRFG | AVAENCRLDK | TTHEIDFNDE  |
|       | 310        | 320         | 330        | 340        | 350         |
| IDM2: | SICKNTRVAY | PLEHIPGALT  | HAVAGHPNNV | IFLTNDAFGV | MPPVARLTPE  |
| PB:   | SICKNTRVAY | PLEHIPGALT  | HAVAGHPRNV | IFLTNDAFGV | MPPVARLTPE  |
|       | 360        | 370         | 380        | 390        | 400         |
| IDM2: | QAMFWFIMGY | TANVPGVEAG  | STPVAKPIFS | SCFAGPFLVR | HATFYGEQLA  |
| PB:   | QAMFWFIMGY | TANVPGVEAG  | NLPVAKPVFS | ACFAGPFLVR | HATFYGEQLA  |
|       | 410        | 420         | 430        | 440        | 450         |
| IDM2: | KKMTEHNARV | WLLNTGYAGG  | RADRGAKRMP | LKVTRAVIDA | IHDGSLDKEE  |
| PB:   | KKMTEHNARV | WLLNTGYAGG  | RADRGAKRMP | LKVTRAVIDA | IHDGSLDREE  |
|       | 460        | 470         | 480        | 490        | 500         |
| IDM2: | YCVYPGWGLQ | IPKRCARVPA  | QLLDRKAWK  | DVKAFNETTK | ELVAMFQASF  |
| PB:   | YIVYPGWGLH | IPKRCARVPS  | HLLDRKAWK  | DVKAFNHTAK | ELVMMFQESF  |
|       | 510        | 520         |            |            |             |
| IDM2: | QKRFAAKASE | ALKSAVPKYV  | ETAHL      |            |             |
| PB:   | EKRFAKASD  | ALKSAVPKYV  | ECAHL      |            |             |

Amino acid sequences of IDM2 and PB, with differences at each position highlighted in red

## Supplemental Figure 4

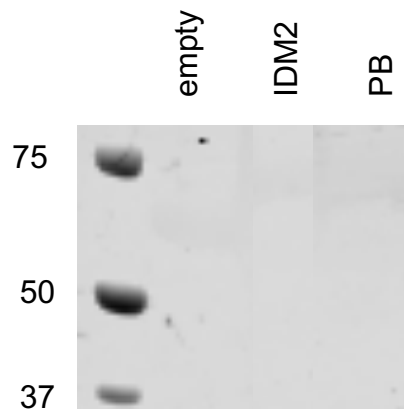

Western blot scan of supernatants from HEK-293T cells that were transfected with IDM2 or PB. We did not detect expression of IDM2 or PB into the media post transfection.
